# Supplementary material for: Application of four-dimension criteria to assess rigour of qualitative research in emergency medicine
Source: BMC Health Serv Res. 2018 Feb 17;18:120. doi: 10.1186/s12913-018-2915-2 (PMC5816375; doi:10.1186/s12913-018-2915-2)
Supplement: Supplementary file 1 — Appendix 1. Interview form. Text. (PDF 445 kb) [file 12913_2018_2915_MOESM1_ESM.pdf]

**4HR/NEAT Project**  
**Interview Schedule:**  
**Qualitative interview – 60 minutes**

*The aim of this research is to understand how the four hour rule/NEAT has had an impact on participating Emergency Departments and hospitals across WA, NSW, QLD and ACT.*

**1. Background information:**

- a. Can you tell me your position here (and how long you have worked in this position at this hospital)?
- b. Have you held any other positions here?
- c. Overall, how long you have been working at [hospital] ED?

**2. What do *you* think about the target?**

- From your personal perspective
- From your professional perspective (e.g. how has it enabled or held back your performance of your role in the ED?)
- From your organisation's perspective (e.g. how well has your ED performed in meeting the target?)

**3. Based on *your* experience prior to the target's introduction, what difference, if any, has the target made to:**

- a. ***Your*** practice?
- b. *For managerial staff only:* The ***hospital*** you manage?

**4. What were the most important issues facing your ED that hindered performance:**

- a. ***Two to five years prior*** to the implementation of the 4hr NEAT?
- b. ***During*** implementation of the 4hr NEAT?
- c. ***Now?***

*Some possible examples:*

- Staffing issues
- Access Block
- Patient Care
- Compliance with the NEAT
- Completeness of care

5. What **changes** were planned **before** the target was implemented (**DATE**), and what has been done **since** its implementation? (Please give us **dates** for these changes where you can.)

*Some possible examples:*

- Physical changes to ED
- Staff role/rostering changes
- Process changes (triage, admission/discharge process, radiology)
- Managerial staff: **policy** level changes?
- Managerial staff: **Financial incentives**/funding changes?

6. What has been the effect of the target on **ED staff** with regard to stress/morale, and how has this had an impact on **patients** and **staff relationships with patients**?

*Some possible examples:*

- Has workload pressure increased/decreased/remained the same as a result of NEAT?
- Has NEAT affected the flow of power through clinical and professional relationships of its staff?
- Has moving patients through the system at a faster rate affected staff interactions/relationships with patients?
- How do you think patients feel about the NEAT?

7. What advice would **you** give other organisations trying to make these kinds of process changes?

8. *For managerial staff only:* We would like to have an overall picture of your hospital's ED, could you fill out the following table:  
*(This table will be filled out by one member of the **managerial or data manager** staff per hospital)*

***Provide answers for the most recent calendar year (2014):***

|                                                                                                                                                                  |                                                                                         |
|------------------------------------------------------------------------------------------------------------------------------------------------------------------|-----------------------------------------------------------------------------------------|
| Total attendances<br>• <i>By ATS categories</i>                                                                                                                  |                                                                                         |
| Total ambulance attendances                                                                                                                                      |                                                                                         |
| Total paediatric attendances (Age < or equal to 15) as per ACEM survey                                                                                           |                                                                                         |
| Total Admissions<br>• <i>Of these, ED short stay admissions</i>                                                                                                  |                                                                                         |
| Total treatment cubicles/locations<br>• <i>Of these– ambulant , non-ambulant cubicles/locations</i>                                                              |                                                                                         |
| ED short stay beds                                                                                                                                               |                                                                                         |
| Total hospital overnight beds (including overnight ED short stay beds)                                                                                           |                                                                                         |
| Typical clinical ED FTE per day<br>• <i>Of these Medical, Nursing, Allied Health</i>                                                                             |                                                                                         |
| Typical ATS Category waiting time compliance for each category                                                                                                   |                                                                                         |
| Typical 4 hour rule compliance for ED short stay admissions                                                                                                      |                                                                                         |
| Typical 4 hour rule compliance for non-ED (i.e. inpatient) admissions                                                                                            |                                                                                         |
| Typical ambulance diversion performance ( <i>circle</i> )                                                                                                        | Not allowed in this State<br><br>Less than an hour a day<br><br>More than an hour a day |
| Typical ambulance ramping issues (i.e. ambulance unloading delayed by more than 15 minutes due to a lack of space in the ED to unload patient) ( <i>circle</i> ) | Less than weekly<br><br>At least once a week<br><br>Most days of the week               |
