# Supplementary material for: Application of four-dimension criteria to assess rigour of qualitative research in emergency medicine
Source: BMC Health Serv Res. 2018 Feb 17;18:120. doi: 10.1186/s12913-018-2915-2 (PMC5816375; doi:10.1186/s12913-018-2915-2)
Supplement: Supplementary file 3 — Appendix 3. Acknowledgements. Text. (PDF 104 kb) [file 12913_2018_2915_MOESM3_ESM.pdf]

# Acknowledgments

## NHMRC Partnership Project APP1029492

### *Project Management Committee:*

**Roberto Forero\***<sup>1</sup>, **Ken Hillman**<sup>1</sup>, **Daniel Fatovich**<sup>2,3</sup>, **Sally McCarthy**<sup>3,4</sup>, **David Mountain**<sup>3,5</sup>, **Peter Sprivulis**<sup>3,5</sup>, **Antonio Celenza**<sup>3,5</sup>, **Paul Tridgell**<sup>6</sup>, **Mohammed Mohsin**<sup>7,8</sup>, **Frank Daly**<sup>3,9</sup>, **Elizabeth Rohwedder**<sup>10</sup>, **Sam Green**<sup>10</sup>, **Sarah Marmara**<sup>11</sup>, **Gerard Fitzgerald**<sup>3,12</sup>, **John Burke**<sup>3,13</sup>, **Paul Middleton**<sup>3,14</sup>, **Drew Richardson**<sup>3,15</sup>

### *Associate Investigators:*

**Nick Gibson**<sup>16</sup>, **Jeffrey Braithwaite**<sup>17</sup>, **Peter Nugus**<sup>18</sup>

### *Staff:*

**Hanh Ngo**<sup>5</sup>, **Wing (Nicola) Man**<sup>1</sup>, **Shizar Nahidi**<sup>1</sup>, **Sam Toloo**<sup>12</sup>, **Josephine De Costa**<sup>1</sup>, **Fenglian Xu**<sup>1</sup> and **Brydan Lenne**<sup>1</sup>

- 1** *Simpson Centre for Health Services Research, University of New South Wales, Kensington,*
- 2** *Centre for Clinical Research in Emergency Medicine, Department of Emergency Medicine, Royal Perth Hospital and University of Western Australia, Perth, WA*
- 3** *Australasian College for Emergency Medicine, West Melbourne, VIC.*
- 4** *Emergency Care Institute, NSW Agency for Clinical Innovation, Chatswood, Sydney, NSW.*
- 5** *Emergency Medicine, University of Western Australia, Crawley, WA,*
- 6** *Paul Tridgell Consulting, Kenthurst, NSW,*
- 7** *Psychiatry Research and Teaching Unit, SWSLHD, NSW Health , Liverpool, NSW,*
- 8** *School of Public Health and Community Medicine, UNSW, Randwick, NSW,*
- 9** *South Metropolitan Health Service, Department of Health Western Australia, Mount Pleasant, WA,*
- 10** *Health System Improvement Unit, Department of Health Western Australia, East Perth, WA*
- 11** *NSW Ministry of Health, North Sydney, NSW.*
- 12** *School of Public Health and Social Work, Queensland University of Technology, Kelvin Grove, QLD,*
- 13** *Department of Emergency Medicine, Royal Brisbane and Women's Hospital, Herston, QLD,*
- 14** *Australian Resuscitation Council of NSW, NSW*
- 15** *Australian National University Medical School and Canberra Hospital ED, Canberra, ACT*
- 16** *Edith Cowan University, Perth, WA*
- 17** *Macquarie University, Sydney, NSW*
- 18** *McGill University, Montreal, Canada*
